# Supplementary material for: The SLE Transcriptome Exhibits Evidence of Chronic Endotoxin Exposure and Has Widespread Dysregulation of Non-Coding and Coding RNAs
Source: PubMed Central journal article supplement (PMC4010412; doi:10.1371/journal.pone.0093846), 2014-05-05

**Figure S2. High novelty and high confidence novel isoforms and loci**

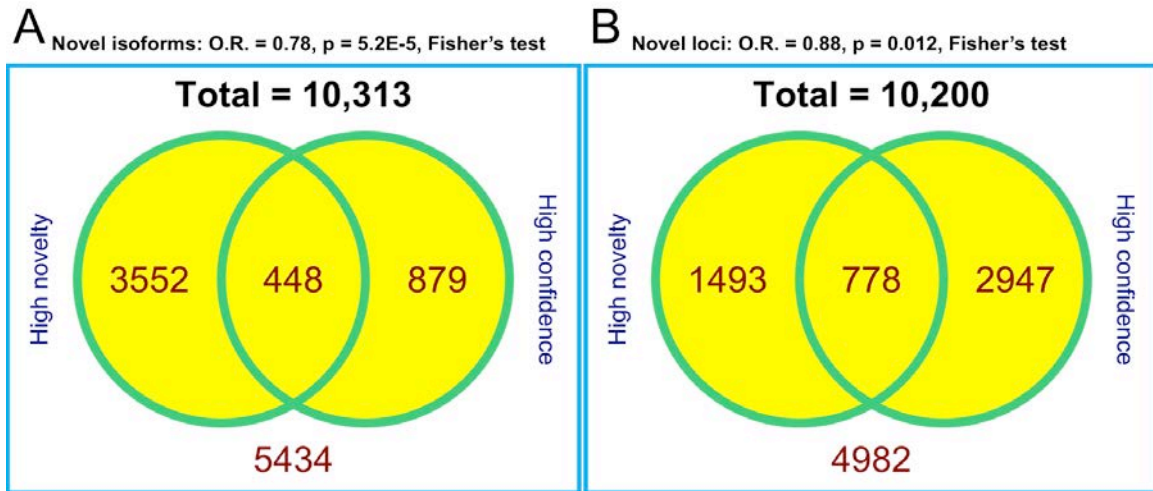

Supplement: pone.0093846.s002.pdf [file pone.0093846.s002.pdf]
